# Supplementary material for: Design of a Novel Sericite–Phosphoric Acid Framework for Enhancement of Pb(II) Adsorption
Source: MDPI journal article supplement (doi:10.3390/molecules28217395), 2023-11-02
Supplement: s1 [file s1]

## Supplementary data

**Table S1.** Adsorption kinetic, isotherm and thermodynamic models.

| Model                         | Equation                                                                                           | Parameters                                                                                                                                                                                                                                  |
|-------------------------------|----------------------------------------------------------------------------------------------------|---------------------------------------------------------------------------------------------------------------------------------------------------------------------------------------------------------------------------------------------|
| PFO                           | $\ln(q_e - q_t) = \ln q_e - k_1 t$                                                                 | $q_t$ : amount of adsorbate adsorbed at time (mg/L)<br>$q_e$ : equilibrium adsorption capacity (mg/g)<br>$k_1$ : pseudo-first-order rate constant (1/min)<br>$t$ : time (min)                                                               |
| PSO                           | $\frac{t}{q_t} = \frac{1}{k_2 \cdot q_e^2} + \frac{t}{q_e}$                                        | $k_2$ : pseudo-second-order-rate constant (L/mg • min)                                                                                                                                                                                      |
| Intra particle diffusion (ID) | $q_t = k_{id} t^{1/2} + C$                                                                         | $k_{id}$ : Intraparticle diffusion rate constant (mg/g•h <sup>0.5</sup> )                                                                                                                                                                   |
| Langmuir                      | $\frac{1}{q_e} = \frac{1}{q_m K_L} \frac{1}{C_e} + \frac{1}{q_m}$<br>$R_L = \frac{1}{1 + K_L C_0}$ | $q_m$ : maximum adsorption capacity (mg/g)<br>$K_L$ : Langmuir constant (L/mg)<br>$C_e$ : equilibrium adsorbate concentration in solution (mg/L)<br>$C_0$ : initial adsorbate concentration in solution (mg/L)<br>$R_L$ : separation factor |
| Freundlich                    | $\ln q_e = \ln K_F + \left(\frac{1}{n}\right) \ln C_e$                                             | $K_F$ : Freundlich constant (mg/g(L/mg) <sup>1/n</sup> )<br>$n$ : heterogeneity factor                                                                                                                                                      |
| Temkin                        | $q_e = B \ln K_T + B \ln C_e$                                                                      | $K_T$ : Temkin equilibrium binding constant (L/mg)<br>$B$ : Temkin constant (J/mol)                                                                                                                                                         |
| Gibbs Free Energy             | $\Delta G^\circ = \Delta H^\circ - T \Delta S^\circ$                                               | $\Delta G^\circ$ : Gibbs free energy change (kJ/mol)<br>$\Delta H^\circ$ : enthalpy change (J/mol)<br>$\Delta S^\circ$ : entropy change (J/mol • K)                                                                                         |
